# Supplementary material
Source: PubMed Central journal article supplement (PMC3837922)
Supplement: AAC.00734-13_zac012132372so1.pdf [file AAC.00734-13_zac012132372so1.pdf]

(A)

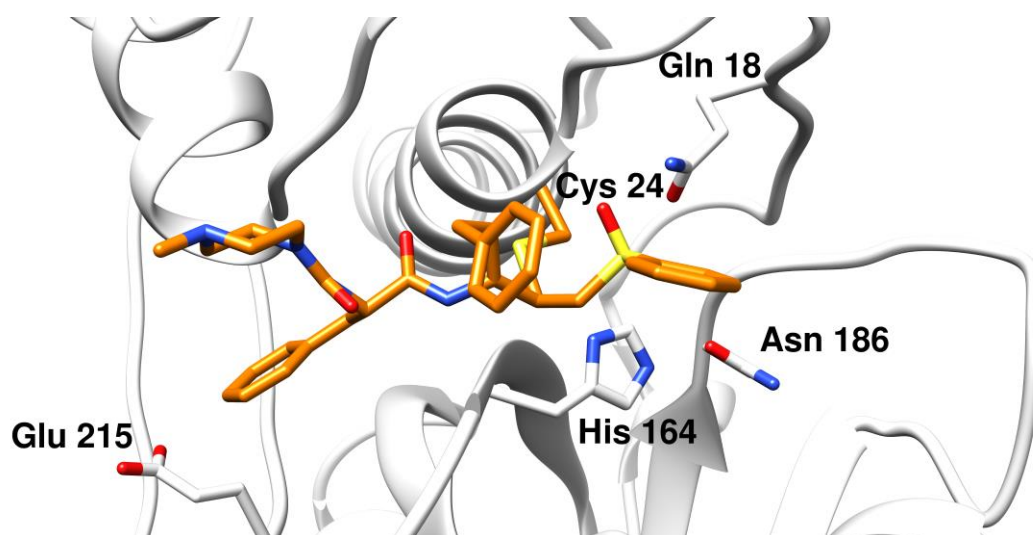

(B)

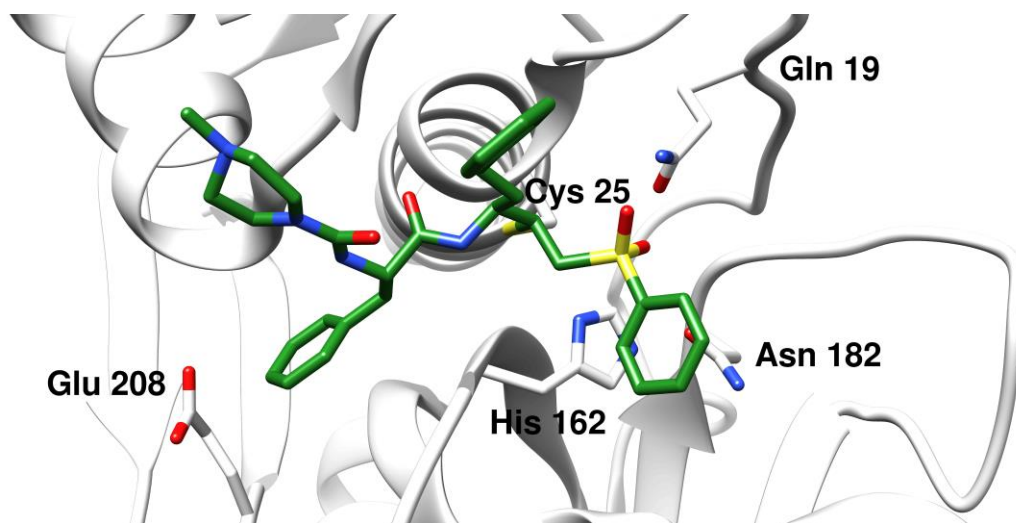

### Supplementary Figure 1

Cryptopain 1 model 'crypto1M' with covalently docked K11777 structurally aligned to cruzain co-crystallized with K11777 (2OZ2). The images of the proteins are displayed separately here to show the individual residues more clearly. The active site residues of crypto1M (A) closely superimpose with those of (B) cruzain (PDB code 2OZ2) and the

pose of the docked ligand is in good general agreement with the co-crystallized ligand. A glutamate at the bottom of the S2 pocket is present in both structures, and is seen in only a few parasite cathepsin L-like proteases, but is common in vertebrate cathepsin B-like proteases. Mammalian cathepsin L proteases typically have an Ala in this position.

Conservation:

|                      |   |                                                              |    |
|----------------------|---|--------------------------------------------------------------|----|
| cgd4                 | 1 | ---M---FKSL-----GKTILL-----AFFYIVFVKCDLPIHVTTADIIGRW         | 36 |
| cgd2                 | 1 | TFLMG-GFKSR-FHI---SLRRKVALFCWF-----FSILIREISSDLPPNCIHGDVVGTW | 50 |
| cgd7                 | 1 | ---MQIGFTEKDLQIPNKSCGRKWNKFIVFINFISFLSIITKINGNLL-----        | 45 |
| cgd6                 | 1 | ---MDIGN-----                                                | 5  |
| cgd3                 |   | -----                                                        |    |
| 2oz2_chainA_p001     |   | -----                                                        |    |
| 1fh0_chainA_p002     |   | -----                                                        |    |
| <u>Consensus aa:</u> |   | .....                                                        |    |
| <u>Consensus ss:</u> |   | .....                                                        |    |

Conservation:

|                      |    |                                                               |    |
|----------------------|----|---------------------------------------------------------------|----|
| cgd4                 | 37 | EFQYSE PANN-----WIDGCGSGVFNKN TQNLQPSLADYNKWLTTKTNGKLEKLDLILT | 90 |
| cgd2                 | 51 | RIHVGTYKPCPSDQKFEDPTCGFPSPDRDFA-----                          | 81 |
| cgd7                 | 46 | --HNGN-----                                                   | 49 |
| cgd6                 |    | -----                                                         |    |
| cgd3                 | 1  | -----CKKEFGIKVSKVN-----                                       | 13 |
| 2oz2_chainA_p001     |    | -----                                                         |    |
| 1fh0_chainA_p002     |    | -----                                                         |    |
| <u>Consensus aa:</u> |    | .....                                                         |    |
| <u>Consensus ss:</u> |    | .....                                                         |    |

Conservation:

|                      |    |                                                             |     |
|----------------------|----|-------------------------------------------------------------|-----|
| cgd4                 | 91 | DLLFSENDYSDLDRSMFPGRSDWTF LAVKDP-----E                      | 122 |
| cgd2                 | 82 | -----HSM LTP TERGLMNNNFKLSFTFDVKFEGSELKVISTQNLGDVDTGKFNDFEK | 133 |
| cgd7                 | 50 | -----HSMNG-NEGSVS-----RTLKQEKDDHSILI-----GKKNETN-           | 81  |
| cgd6                 |    | -----                                                       |     |
| cgd3                 | 14 | -----KKKKRKLII LNLI-----                                    | 26  |
| 2oz2_chainA_p001     |    | -----                                                       |     |
| 1fh0_chainA_p002     |    | -----                                                       |     |
| <u>Consensus aa:</u> |    | .....                                                       |     |
| <u>Consensus ss:</u> |    | .....                                                       |     |

Conservation:

|                      |     |                                                           |     |
|----------------------|-----|-----------------------------------------------------------|-----|
| cgd4                 | 123 | NGKVVGRWMTM VYDEGFEI VVNNM-----TI                         | 147 |
| cgd2                 | 134 | VGT-TGNWTVILDQAFTFWTKSY-----RY                            | 157 |
| cgd7                 | 82  | -----TEIFSP-----NNYSSQSSTKLVDRHTENFIEKDFQKNNSLVEEDNLT SKF | 127 |
| cgd6                 | 6   | -----NV-----                                              | 7   |
| cgd3                 | 27  | -----LYSP-----                                            | 30  |
| 2oz2_chainA_p001     |     | -----                                                     |     |
| 1fh0_chainA_p002     |     | -----                                                     |     |
| <u>Consensus aa:</u> |     | .....                                                     |     |
| <u>Consensus ss:</u> |     | .....                                                     |     |

Conservation:

|                      |     |                                                         |     |
|----------------------|-----|---------------------------------------------------------|-----|
| cgd4                 | 148 | FGIMKYNLLNNGNCSAKDGDNETTKGETLCYETDSSQIQIGWY-----        | 190 |
| cgd2                 | 158 | TAFFKYINEHED-----INASYCYCHTT-----LLGWWDSPESVISNQDNKEEN  | 202 |
| cgd7                 | 128 | FDPFVFN-FSID-----VHCISKYEKL-----NKYLQKI---SLIFYLFNKTR E | 168 |
| cgd6                 | 8   | -----EEHQE-----YISGPYI-ALI-----NGNTQ                    | 27  |
| cgd3                 |     | -----                                                   |     |
| 2oz2_chainA_p001     |     | -----                                                   |     |
| 1fh0_chainA_p002     |     | -----                                                   |     |
| <u>Consensus aa:</u> |     | .....                                                   |     |
| <u>Consensus ss:</u> |     | .....                                                   |     |

Conservation:

|                      |     |                                                           |     |
|----------------------|-----|-----------------------------------------------------------|-----|
| cgd4                 | 191 | -----YLRDS-KKRGCVSGRKDES YEN-----                         | 211 |
| cgd2                 | 203 | -----KILSLEERSKYNNYPWLVMS EDLK-LRRGCWYGMRI FDGD-----      | 241 |
| cgd7                 | 169 | LENEGLNNS TSILKAEN-----ERVVNTTIK-INIATNSG-KMDNHLDI IQPEVF | 218 |
| cgd6                 | 28  | -----QREPNKKLKNII IATL-----                               | 43  |
| cgd3                 |     | -----                                                     |     |
| 2oz2_chainA_p001     |     | -----                                                     |     |
| 1fh0_chainA_p002     |     | -----                                                     |     |
| <u>Consensus aa:</u> |     | .....                                                     |     |
| <u>Consensus ss:</u> |     | .....                                                     |     |

Conservation:

|      |     |                                                              |     |
|------|-----|--------------------------------------------------------------|-----|
| cgd4 |     | -----                                                        |     |
| cgd2 |     | -----                                                        |     |
| cgd7 | 219 | FNSIYRTNTTWMDRLLDTPNINSSPMNLLNLTNNQDNSQSIIDCICIFVSEVQSNLGLNR | 278 |
| cgd6 | 44  | -----IAIFIVLVVTV-----                                        | 54  |

cgd3  
2oz2\_chainA\_p001  
1fh0\_chainA\_p002  
Consensus aa:  
Consensus ss:

Conservation:  
cgd4 212 -----SLDI IKNRVEIPIKKSFESSIRSLNSLQEFahrhnrkds-----KNWR 255  
cgd2 242 -----GKMTDRTEWTLKLPWRSSPLGLPPDHPVNAQNPT 276  
cgd7 279 SSLEICNIKIQEIIISAIKSNPEARFELTQLSLDRPPSKLIIPKNLG-----DKVT 328  
cgd6 55 -SLYITNNTSDKIDDFV-PGDYVDPATREYRKSFEFFKKYHKVYS-----SMEE 102  
cgd3  
2oz2\_chainA\_p001  
1fh0\_chainA\_p002  
Consensus aa:  
Consensus ss: hhhhhh hhhh hhh

Conservation:  
cgd4 256 -ARNSFLTD--VAFSHHSYYMN-AVNRKIHP-----FRIMGSQHSSFIEMF 299  
cgd2 277 -IAEYLNEVSAKYSEFESKNLWRSNKFEIGDIQNLDLTPKVRKALKISP HFVQRKKS 335  
cgd7 329 GYSWKESIAEGKEIQSENLLGRS-VQKLEP THS-----SGNEILKELMNTENS 375  
cgd6 103 -ENQRFEIYKQNMNFIKTTNSQG-FSYVLEMNE-----FGDLSKEEFMARFTG 148  
cgd3  
2oz2\_chainA\_p001  
1fh0\_chainA\_p002  
Consensus aa:  
Consensus ss: hhhhhhhh hhhhhh hhhhhhhh

Conservation: 7 5  
cgd4 300 K-----DGVGSDNYDNIVDSIFACNVVRKTDVKLPSSFSIGDPFTD----EKYSD 348  
cgd2 336 DEYITEISSVREEEQIS-GSKNNTDEPIWMRIRSFWDWANPQHVVYGRGKVV----RLIP 389  
cgd7 376 A-----GNGVNETGE-ITN-----KNIYFDSRDVNGG-----SCVY 405  
cgd6 149 Y-----IKDSKDDER-VFKS---SRVSASESEEFVPPNSINWVEA-----GCVN 189  
cgd3 31 -----FRIPESFDLRSNEANRKNKGSCIT 54  
2oz2\_chainA\_p001 1 -----APAAVDWRAR-----GAVT 14  
1fh0\_chainA\_p002 1 -----LPKSDVWRKK-----GYVT 14  
Consensus aa: .....Pp<sup>h</sup>sh<sup>h</sup>.....hls  
Consensus ss: ee

Conservation: 696 97 9 7655 79 7 9 5  
cgd4 349 FPFNQGNCGSCYAVSSVYILAKRAELKLNKLTNGASREEKILLS PQSVLSCSP----FNQ 404  
cgd2 390 EVFNQGDGDCFAVTAATIITSRLWIKYSNEPDILR---K IYASSIQMSECNV----YNQ 442  
cgd7 406 IPFDGKCGGQYAFVVSASISISNCIQKLVL-----PAPLS PQQIIDCSMS--FGNL 455  
cgd6 190 PIRNQGKCGSCWAFSAVAALLEGATCAQTNRG-----LPSLS EQQFVDCSKQ--NGNF 239  
cgd3 55 FPDNQGKCANQYNFSALSAIEGATCRQLGKR-----IPPLSQHSLDCWLQSKGSVK 106  
2oz2\_chainA\_p001 15 AVKDGQCGSCWAFSAIGNVECQWFLAGHP-----LTNLS EQMLVSCDKT--DSGC 63  
1fh0\_chainA\_p002 15 PVKNQKQCGSCWAFSATGALEGQMFRKTGK-----LVSLSEQNLVDCSRP--QGNQ 63  
Consensus aa: .s.sQ.pCGsC@Ahoths.lp..hh.p.....b..LS.QphlsCs.....h.  
Consensus ss: hhhhhhhhhhhhhhhhh hhhhhh

Conservation: 57 77 6 555  
cgd4 405 GCEGGYPFLVGRQAEI-----GISSEKCMGYADSNQE----CNF-----SPFITPE 448  
cgd2 443 GCGGLITLAFKFAQEV---GVRTQDCVDYAKNLGL---KEIYPTPVYTPDEVGIA 493  
cgd7 456 GCDGGFYSNGWSYLLEQNVPRNYICSWNEYPYIDSISSC---KAS-----ACNGCLT 504  
cgd6 240 GCDGGTMGLAFQYAIKKN---YLCTNDDYPYFAEEKTC---MDS-----FCENYIEIP 286  
cgd3 107 ACSGGQTFEVFNIAIKS---KVCTRDSYPSTTHKTGKLGCKSN-CNECVGIKNFKWS 160  
2oz2\_chainA\_p001 64 SGLMNAFEWIVQENNG---AVYTEDSYPYASGEGISP--PCTTS-----GHTVGAT 111  
1fh0\_chainA\_p002 64 GCNGGF MARAFQYVKENG---GLDSEESYPYVAVDEIC---KYR-----PENSVAQ 108  
Consensus aa: tCsGG...s@phhbc.....l.opcshs.hs.p.....h.  
Consensus ss: hhhhhhhhhh eee

Conservation:  
cgd4 449 IEDRIYCE----- 456  
cgd2 494 DDGHSFLQTKKGGK FESKKSIIKEIKQQEGDNQ EYDQ EHDQ EHDQ EHEQEHEQEHE 553  
cgd7 505 ISKYNVFTG----- 513  
cgd6 287 VKAYKYVF----- 294  
cgd3 161 YTGSSILY----- 168  
2oz2\_chainA\_p001 112 ITGHVELP----- 119  
1fh0\_chainA\_p002 109 DTGFTVVA----- 116  
Consensus aa: .ps..hh.....  
Consensus ss: eeeeeee

Conservation:

cgd4  
cgd2 554 QEHEREHDQEQGQKHDQKYQDDYKDMEEHLEGSDSA EHI SNVHDYYGDSDDENS SDNEEL 613  
cgd7  
cgd6  
cgd3  
2oz2\_chainA\_p001  
1fh0\_chainA\_p002  
Consensus aa:  
Consensus ss:

Conservation:

cgd4 457 -----EGERMYAEEYGY 468  
cgd2 614 GHLSGAKYNI PKKFNVIQQICWDLGGHMGAAANTQCRKDIPITKNIPKSCSKIIKVKEYSY 673  
cgd7  
cgd6  
cgd3  
2oz2\_chainA\_p001  
1fh0\_chainA\_p002  
Consensus aa:  
Consensus ss:

Conservation:

976 76 5 9 9

cgd4 469 VGGCYGCCDEDRMKEEIFKNGPIAVAMHIDT-SLLVYDNGVYDSIPNDHTKYCDLPNKQL 527  
cgd2 674 VNNVYGKTTARDIMESLWNEGPVAVSLEPTL-EFSLYNSGVFKGFYDPI TRQ---YPWSS 729  
cgd7 514 -LALNGDDGWDFVTTILPKVGSISLSINSNLPGFSSYSDGIYKAPKCTT----- 561  
cgd6 295 -----PRNINALKTALAKYGPISVAIQADQTPFQFYKSGVFDAPCG----- 335  
cgd3 169 -----EDPWDVITDAIYNVGPVTVSVCSLMPGFNLYSGGYEPPTCGSI-----W 213  
2oz2\_chainA\_p001 120 -----QDEAQIAAWLAVNGPVAVAVDASS--WMTYTGGVMTSCVS----- 157  
1fh0\_chainA\_p002 117 -----PGKEKALMKAVATVGPISVAMDAGHSSFFQFYKSGIYFEPDCS----- 158  
Consensus aa:  
.....sbp.l.p.lhp.GPltVthpss..s@.hYpsGl@ps..s  
Consensus ss:  
hhhhhhhhhh eeeeeee h ee

Conservation:

6965 965 96 9997 99 96 5 5 5

cgd4 528 NGWEYTNFAIAIVGWGEE---NGIPYWIIRNSWGANWGKKGYAKIRRGK----NIGGIE 579  
cgd2 730 IPWHKVDHAMVITGWGWETYGNRIYWIWVQNSWGKRWGEGKFCRIIRGV----NELSIE 785  
cgd7 562 --HSELNFAVIMIGYGINDE---NGDKYYVQNSWGSVWIGGFMMNVSADSCDMFWYPGII 616  
cgd6 336 ---TKVNHGVVLVGYDMDE--DTNKEYWLVNNSWGEAWGEKGYIKLALHSGK-KGTGCGIL 389  
cgd3 214 CGTRQVDHAVTLIGYGVSE---SGKRYIYMKNSWGLSWGNGKGFMMNISAD-----MCSTF 264  
2oz2\_chainA\_p001 158 ---EQLDHGVLLVGYNDS---AAVPYWI IKNSWTTQWEEGYIRIAKGS---NQCLVK 206  
1fh0\_chainA\_p002 159 --SKNLDHGVLLVGYGFEFEGANSDNSKYWLVKNSWGP EWGSNGYVKIAKDK---NNHCGIA 213  
Consensus aa:  
...ppisHtIhIIG@s.p...ss..Y@lhpNSWG.pWGppG@hpl..sp...s.stIb  
Consensus ss:  
eeeeeeeee eeeeeee eeeee

Conservation:

cgd4 580 NOAVFIDPDPFTRGMGLS-----LLNKYQNSTAYRTNLPDIKDSPQGSE--KVNVEIVNGG 632  
cgd2 786 HAAVRASVKIYDSDRKY---KAADLQKVHD-----ESV-FQYL- 819  
cgd7 617 ROVSSES LPDKCTGNKLLLTGPGEINKPQKSTEYNI FLKTTYGICLIINILL-LVY-- 673  
cgd6 390 VEPVYPVINQSI----- 401  
cgd3 265 FNPGWVTSVSM DGISDY-----CLNREPKNE--IAH-DFVI-- 298  
2oz2\_chainA\_p001 207 EEASSAVG----- 215  
1fh0\_chainA\_p002 214 TAASYPNVX----- 222  
Consensus aa:  
...ss..s.s.  
Consensus ss:  
eeeeeee

Conservation:

cgd4 633 VDQ 635  
cgd2 ---  
cgd7 ---  
cgd6 ---  
cgd3 ---  
2oz2\_chainA\_p001 ---  
1fh0\_chainA\_p002 ---  
Consensus aa:  
...  
Consensus ss:

## Supplementary Figure 2.

Full multiple sequence alignment (MSA) of family C01 peptidases from *C. parvum* and the sequences for two structures (cruzain and human cathepsin L). Only the regions corresponding to active site residues are shown in Figure 7 in the main article. All five C01 *C. parvum* sequences as well as PDBs for cruzain (2OZ2) and human cathepsin L (1FH0) were used as input into PROMALS3D (see Methods) to generate the MSA. The active site residues (Q, C, H, and N in blue boxes) are strictly conserved but the S2 pocket Glu in cryptopain 1 is in a variable region and appears to be conserved only in cruzain (pink box). Cathepsin L-like sequences (“cyrptopains”): cgd6 = cryptopain 1, cgd3 = cyrptopain 2, cgd7 = cryptopain 3; cathepsin C-like sequences: cgd2 and cgd4. Higher conservation is shown with higher numbers in “Conservation.” Strictly conserved amino acids are shown as bold, upper case letters in “Consensus\_aa.” Consensus\_ss denotes where conserved secondary structure is predicted: e = beta strand (blue letters), h = alpha helix (red letters).
